# Supplementary material for: One-pot self-assembly of three-dimensional graphene macroassemblies with porous core and layered shell
Source: Royal Society of Chemistry journal article supplement (doi:10.1039/c1jm11728a), 2011-01-01
Supplement: c1jm11728a.pdf [file c1jm11728a.pdf]

## Supporting Information

# One-pot self-assembly of three-dimensional graphene macroassemblies with porous core and layered shell

Wei Lv, Ying Tao, Wang Ni, Zhi Zhou, Fang-Yuan Su, Xue-Cheng Chen, Feng-Min Jin and Quan-Hong Yang\*

Key Laboratory for Green Chemical Technology of Ministry of Education, School of Chemical Engineering and Technology, Tianjin University, Tianjin 300072 (China)

\*Corresponding author. [qhyangcn@tju.edu.cn](mailto:qhyangcn@tju.edu.cn)

### I. XPS spectrum of the formed macroassembly

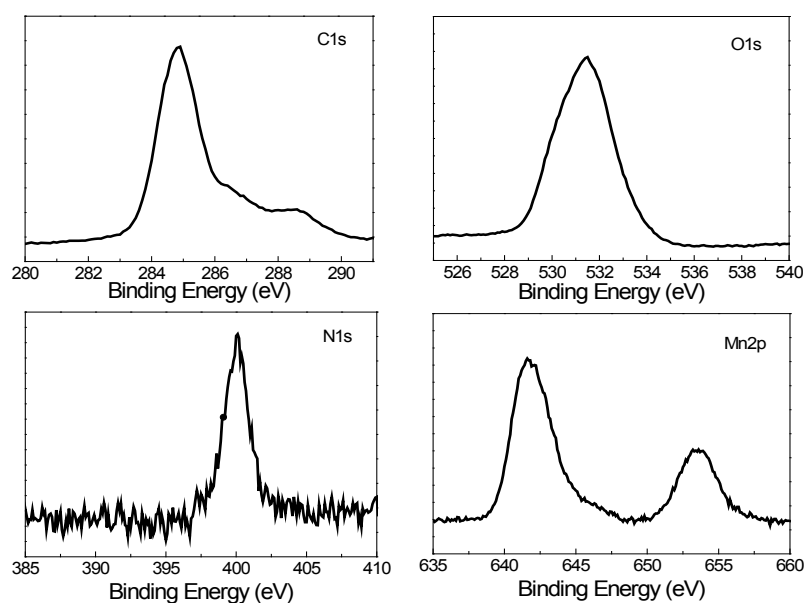

**Figure S1.** Typical XPS spectra for a CSGM constituted with reduced graphene sheets (in the preparation, the concentrations of GO and  $\text{KMnO}_4$  are 2 mg/mL and 0.36 mg/mL respectively, and we denote the as-prepared CSGM as CSGM-B in the following tests). The  $\text{C}_{1s}$  spectrum indicates that graphitic carbon is dominant and only low concentration of oxygen containing group is bonded to carbons.

## II. EDS analysis for the core and shell

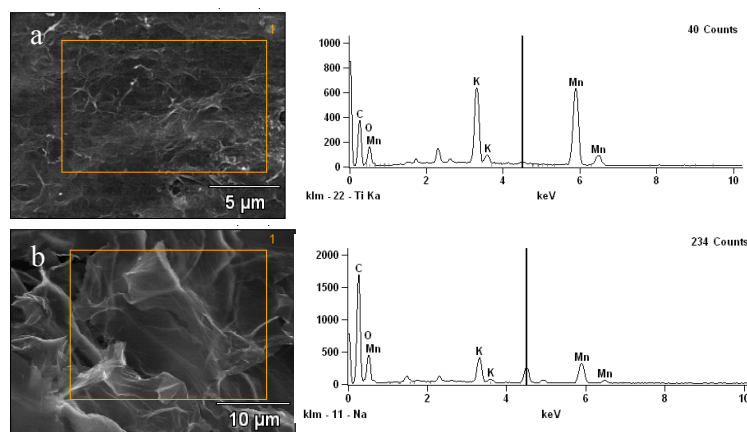

**Figure S2.** EDS spectra of the shell and core separated from the CSGM-B. (a): shell and (b): core. From the EDS analyses, we can identify the differences of composition of core and shell clearly. The element analysis shows the Mn containing in the shell is about 17 wt%, while in the core it is only about 2 wt%. The K element derived from the  $\text{KMnO}_4$  is also mainly adsorbed on the shell.

## III. TG profile of the core and shell

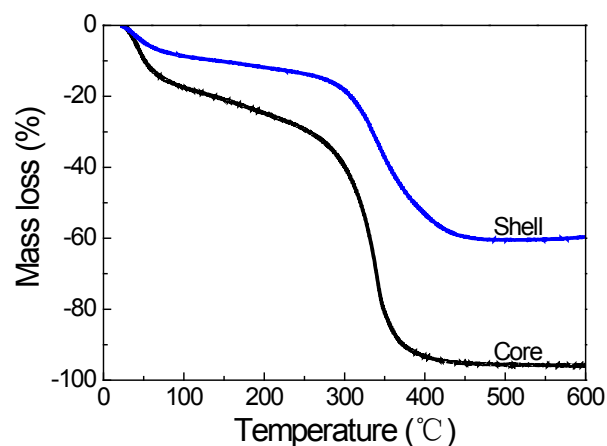

**Figure S3.** TG profiles of CSGM-B performed in air atmosphere. The residual ratio of core after C element was burnt out is only 3 wt% which corresponds to the EDS analysis, while the residual ratio of shell is about 40 wt% due to existence of residual K and Mn element.

#### IV. XRD patterns of the core and shell

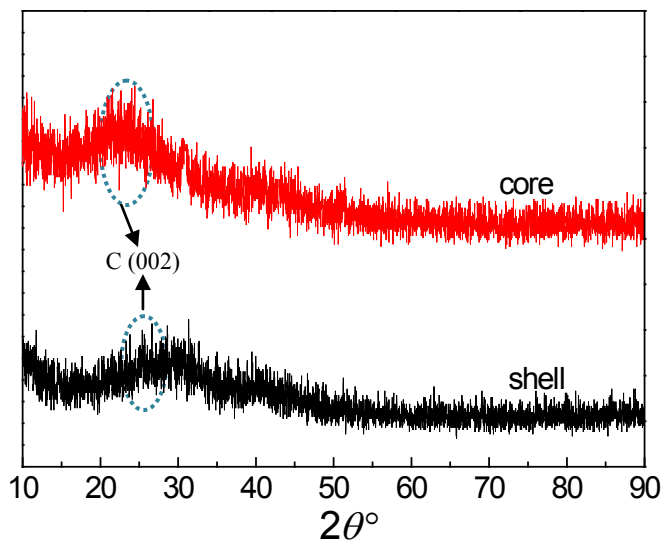

**Figure S4.** XRD patterns of shell and core separated from CSGM-B. The XRD patterns show broadened and small peaks appeared around  $24$  and  $26^\circ$  for the core and shell respectively suggesting the existence of partly stacked graphene sheets with different interlayer spacing, and the shell has a more tightly stacking structure than the core.
